# Supplementary material for: Prognostic Role of Plasma PD-1, PD-L1, pan-BTN3As and BTN3A1 in Patients Affected by Metastatic Gastrointestinal Stromal Tumors: Can Immune Checkpoints Act as a Sentinel for Short-Term Survival?
Source: MDPI journal article supplement (doi:10.3390/cancers13092118), 2021-04-27
Supplement: s1 [file s1]

# Supplementary Material: Prognostic Role of Plasma PD-1, PD-L1, Pan-BTN3As and BTN3A1 in Patients Affected by Metastatic Gastrointestinal Stromal Tumors: Can Immune Checkpoints Act as a Sentinel for Short-Term Survival?

Daniele Fanale, Lorena Incorvaia, Giuseppe Badalamenti, Ida De Luca, Laura Algeri, Annalisa Bonasera, Lidia Rita Corsini, Chiara Brando, Antonio Russo, Juan Lucio Iovanna and Viviana Bazan

## Text S1: Experimental Protocol

- All steps of four ELISA tests are run at Room Temperature (RT).
- Before starting assay, all plasma samples were diluted 1/5 on a final volume of 100  $\mu$ L (20  $\mu$ L plasma + 80  $\mu$ L of dilution buffer) for each well, in order to make negligible the interference of the plasma matrix.
- The dilution buffer used to dilute the plasma samples consists of Tris/NaCl/BSA/trehalose/thimerosal.
- The plates are coated overnight with the antibody selected for capture diluted in Tris buffer and then blocked with Tris/BSA buffer.
- For the dosage, the specific recombinant protein (PD-L1/PD1/BTN3A1/pan-BTN3As) is placed in the plate with an associated control (dilutions are made in the dilution buffer described above). A negative control (named “white”) is used. Samples to be tested are incubated for 3 hours at RT.
- Wash 5 times in PBS-Tween buffer.
- A biotinylated antibody (diluted in Tris buffer /rabbit serum) is added to form the “sandwich”. Incubate for 30 min at RT.
- Wash 5 times in PBS-Tween buffer.
- Avidin-peroxidase (HRP) conjugate is added. Incubate for 15 min at RT.
- Add the TMB (3,3',5,5'-Tetramethylbenzidine) substrate. Incubate for 15 min at RT in the dark.
- The reaction is stopped with H<sub>2</sub>SO<sub>4</sub> and OD (optical density) read at 450 nm.

**Table S1.** Plasma concentrations of PD-1, PD-L1, BTN3A1, pan-BTN3As in mGIST patients.

| sPD-1 (ng/mL) | s-PD-L1 (ng/mL) | sBTN3A1 (ng/mL) | pan-sBTN3As (ng/mL) |
|---------------|-----------------|-----------------|---------------------|
| 2.29          | 0.52            | 0.70            | 0                   |
| 8.10          | 0.49            | 4.20            | 5.00                |
| 5.90          | 0.42            | 5.40            | 3.90                |
| 6.50          | 0.62            | 6.80            | 4.20                |
| 6.79          | 0.54            | 7.00            | 3.50                |
| 7.24          | 0.36            | 6.60            | 4.30                |
| 6.70          | 0.70            | 6.90            | 3.50                |
| 5.50          | 0.37            | 3.87            | 2.30                |
| 6.20          | 0.30            | 0.89            | 2.50                |
| 6.65          | 0.74            | 7.19            | 4.38                |
| 8.53          | 1.04            | 8.94            | 5.63                |
| 9.46          | 1.36            | 11.50           | 3.90                |
| 11.67         | 1.31            | 12.95           | 8.24                |
| 15.63         | 2.12            | 13.53           | 8.23                |
| 7.90          | 1.91            | 2.20            | 4.25                |
| 7.30          | 0.86            | 8.90            | 5.70                |
| 8.45          | 0.79            | 4.50            | 6.70                |
| 9.60          | 1.12            | 10.50           | 8.10                |

---

|       |      |       |      |
|-------|------|-------|------|
| 8.30  | 1.10 | 12.90 | 7.10 |
| 11.20 | 1.73 | 11.90 | 4.25 |
| 15.46 | 1.77 | 5.68  | 4.24 |
| 9.29  | 0.83 | 9.21  | 6.12 |
| 13.68 | 1.19 | 9.70  | 6.98 |
| 15.44 | 0.76 | 10.59 | 6.79 |
| 13.21 | 1.25 | 12.07 | 8.46 |
| 9.63  | 2.19 | 12.16 | 8.53 |
| 19.77 | 2.22 | 10.47 | 6.97 |
| 24.22 | 1.08 | 10.38 | 9.36 |
| 12.11 | 1.17 | 12.24 | 7.72 |
| 15.63 | 2.12 | 13.53 | 8.23 |
